**PERSISTENT INWARD CURRENTS INCREASE WITH THE LEVEL OF  
VOLUNTARY DRIVE IN PLANTAR FLEXOR LOW-THRESHOLD MOTOR  
UNITS**

Lucas B. R. Orssatto <sup>1\*</sup>; Karen Mackay <sup>1</sup>; Anthony J. Shield <sup>1</sup>; Raphael L. Sakugawa <sup>2</sup>;  
Anthony J. Blazeovich <sup>3</sup>, Gabriel S. Trajano <sup>1</sup>

<sup>1</sup> School of Exercise and Nutrition Sciences, Faculty of Health, Queensland University  
of Technology (QUT), Brisbane, Australia.

<sup>2</sup> Biomechanics Laboratory, Department of Physical Education, Federal University of  
Santa Catarina, Florianopolis, Brazil.

<sup>3</sup> Centre for Exercise and Sports Science Research (CESSR), School of Medical and  
Health Sciences, Edith Cowan University, Joondalup, Australia.

\*Corresponding author: Lucas B. R. Orssatto (l.betdarosaorssatto@qut.edu.au).

## ABSTRACT

**Aim:** To test the hypothesis that estimates of persistent inward currents in the human plantar flexors would increase with the level of voluntary drive.

**Methods:** Twenty-one participants volunteered for this study (29.2±2.6 years). High-density surface electromyograms were collected from *soleus* and *gastrocnemius medialis* during ramp-shaped isometric contractions to 10%, 20%, and 30% (torque rise of 2%/s and 30-s duration) of each participant's maximal torque. Motor units identified in all the contraction intensities were included in the paired motor unit analysis to calculate delta frequency ( $\Delta F$ ).

**Results:** Significant increases in PIC were observed from 10% to 20% ( $\Delta=0.6$  pps;  $p<0.001$ ) and 20% to 30% ( $\Delta=0.5$  pps;  $p<0.001$ ) in *soleus*, and from 10% to 20% ( $\Delta=1.2$  pps;  $p<0.001$ ) but not 20% to 30% ( $\Delta=0.09$  pps;  $p=0.724$ ) in *gastrocnemius medialis*. Maximal discharge rate increased for *soleus* and *gastrocnemius medialis* from 10% to 20% (respectively,  $\Delta=1.75$  pps,  $p<0.001$ ; and  $\Delta=2.43$  pps,  $p<0.001$ ) and 20% to 30% (respectively,  $\Delta=0.80$  pps,  $p<0.017$ ; and  $\Delta=0.92$  pps,  $p=0.002$ ). The repeated-measures correlation method identified associations between  $\Delta F$  and increases in maximal discharge rate for both *soleus* ( $r=0.64$ ;  $p<0.001$ ) and *gastrocnemius medialis* ( $r=0.77$ ;  $p<0.001$ ).

**Conclusion:** An increase in voluntary drive tends to increase PICs strength, which has key implications for the control of force but also for comparisons between muscles or between studies when relative force levels might be different. These data indicate that increases in voluntary descending drive amplify PICs in humans and provide an important spinal mechanism for motor unit firing, and thus force output modulation.

# INTRODUCTION

The force produced by a skeletal muscle during contraction is largely dependent upon the number of recruited motor units and their discharge rates<sup>1</sup>. In the presence of monoaminergic input (i.e. neuromodulation), motor neurone discharge rates are increased by the development of persistent inward currents (PICs)<sup>2-4</sup>, which are depolarising currents generated by voltage-sensitive sodium and calcium channels primarily located on motor neurones<sup>5-7</sup>. PICs amplify and prolong excitatory synaptic input, allowing a greater muscle force production for a given level of descending drive as well as the capacity to maintain contraction even as descending drive is reduced below the level required for initial muscle activation. Monoamines such as serotonin and noradrenaline facilitate PICs, changing the input-output gain of motor neurones up to 5-fold<sup>2-4</sup>. Additionally, the motor system would benefit from gain adjustments in order to produce varying levels of force, and it has been hypothesised that PICs could act as a variable gain control system by introducing non-linearities in the input-output relationship, offering an elegant solution to appropriately amplifying inputs to achieve forces across a diverse range of motor activities<sup>8</sup>. Both animal experiments<sup>9,10</sup> and computational models<sup>11-13</sup> indicate that a non-linear relationship exists between the ionotropic input and the excitatory motor output, which depends on the intensity of the muscle contraction<sup>14</sup>. Thus, PICs may act as the main gain control mechanism within motor neurones<sup>8,15</sup>, playing an important role in normal motor behaviour by allowing optimum muscle force control.

In human motor neurones it is not possible to directly measure PIC amplitudes. However, by using the discharge rates of motor units during voluntary contractions, PIC amplitudes can be estimated using the paired motor unit technique<sup>10,16,17</sup>. Paired motor unit analysis consists of pairing the discharge rates of a low threshold or *control unit* to a higher threshold or *test unit*<sup>10,16,17</sup>. These are obtained during a slowly-increasing and -decreasing ramped contraction. The difference in discharge rate of the control unit at the time of recruitment and de-recruitment of the test unit is calculated and referred to as the  $\Delta$  frequency ( $\Delta F$ ).  $\Delta F$  has been validated using both animal and computer models, and is considered to be proportional to PIC amplitude<sup>10,18</sup>. Therefore, a higher  $\Delta F$ , representing a greater difference in recruitment and de-recruitment discharge rates, indicates a higher PIC amplitude.

Contraction intensity-dependent PIC amplification has significant implications for our understanding of the modulation of skeletal muscle force. However, despite the increasing evidence of intensity-dependent PIC amplification, it is still not known whether this phenomenon exists in human motor neurones. Although the extrapolation of gain-control physiology from animal preparations or computational simulations to human physiology are comprehensible, it has been shown that PIC amplification varies between animals and within muscle groups<sup>9,15,19–22</sup>, so direct testing across human muscles is needed<sup>23,24</sup>. In fact, two recent studies<sup>23,24</sup> reported no differences in the PIC amplitudes (estimated through paired-motor unit  $\Delta F$  analysis) across different motor outputs (10%, 20%, and 30% of maximal voluntary force). Nevertheless, these results should be interpreted cautiously because of their methodological design. They adopted a different rate of torque rise and decline among intensities, which could have underestimated the  $\Delta F$ s obtained at higher intensities due to spike threshold accommodation<sup>11</sup>. Also, they did not compare the same motor units across contraction intensities. These studies used surface high-density electromyography and algorithm decomposition to investigate the discharge patterns of motor units across different intensities. However, because the decomposition algorithm tends to identify a lower proportion of lower-threshold motor units during higher intensities contractions<sup>25</sup>, they might have compared different motor units with distinct recruitment characteristics. Aiming to address the limitations of the previous studies, we tested the hypothesis that PIC amplitudes would increase according to muscle contraction intensity in human *soleus* and *gastrocnemius medialis* adopting the same rate of torque rise and contraction duration, and tracking the same motor units across different contraction intensities.

## METHODS

### Participants and ethical procedures

To participate, volunteers had to be free from neural and musculoskeletal disorders in the lower limb. All participants were asked to avoid coffee and medications that could influence monoaminergic release, such as serotonin or noradrenaline. Furthermore, they were asked to abstain from exercising 24 h prior to the testing session. Participants were excluded from the data analyses if: a) no usable motor units were

identified by the decomposition algorithm; or b) if it was not possible to pair available motor units (see details below). This study was approved by the local Human Research Ethical Committee of the Queensland University of Technology, and all participants gave written informed consent prior to participation in the study.

## Study design and neuromuscular testing procedures

Participants visited the laboratory on one occasion, during which participants were familiarised with testing procedures and data were collected from the plantar flexors. After electrode placement on *soleus* and *gastrocnemius medialis*, the participants were seated upright on the chair of an isokinetic dynamometer (Biodex System 4, Biodex Medical system, Shirley, NY) with the knee fully extended ( $0^\circ$ ) and ankle at neutral position ( $0^\circ$ ). A warm-up consisting of six 5-s voluntary submaximal isometric plantar flexion contractions ( $2 \times 40\%$ ,  $2 \times 60\%$  and  $2 \times 80\%$  of their perceived maximal effort) was performed, followed by three maximal voluntary contractions of  $\sim 3$ -s with 30-s rest intervals. The maximum torque achieved was recorded as their maximal voluntary torque. Next, participants were familiarised with both trapezoidal and triangular ramped contractions. Both triangular and trapezoidal contractions have been used previously to calculate  $\Delta F$ s using the paired motor unit analysis<sup>26,27</sup>. These ramp-shaped contractions were performed to 10, 20 and 30% of their maximal voluntary contraction torque. All contractions had a duration of 30 s and a rate of torque increase and decrease of 2%/s. Contraction duration was equalised between tests at different intensities because longer muscle contractions result in a spike frequency adaptation, making motor units discharge at lower frequencies for a given force, inflating the  $\Delta F$ s<sup>28</sup>. Also, rate of torque production was identical between contraction intensities because faster rates can reduce  $\Delta F$ s due to spike-threshold accommodation<sup>28</sup>. Therefore to control the torque condition in which we compared the three intensities, the same amount of torque (10% of MVC) with the same rate of torque rise (2% per s) was observed in the initial and final 5 s of each contraction intensity. Participants were instructed to follow a torque path provided in real time on a large computer monitor (Figure 1) during each ramp-shaped contraction. Five minutes after the familiarisation, the order of the ramped contractions was randomised, and data collection proceeded. Participants performed 2-3 attempts at each intensity with 40-s rest

- 1 intervals. When an abrupt increase or decrease in torque was observed, the respective
- 2 contraction was excluded.

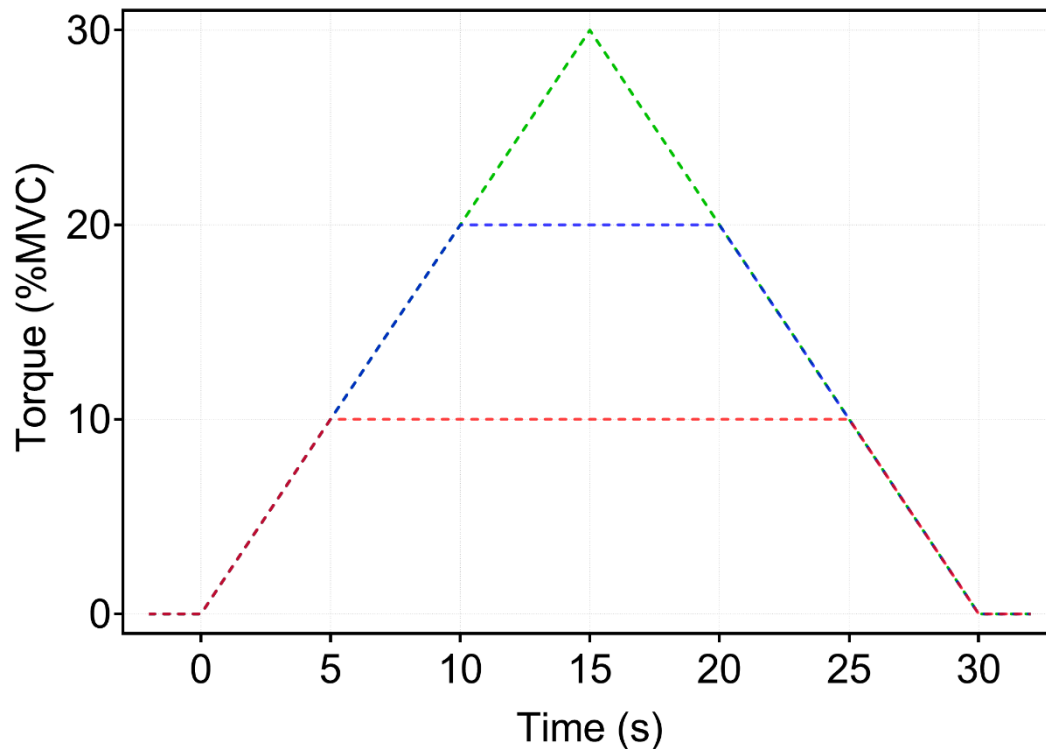

3

4 **Figure 1. Torque path for ramp-shaped contractions at each contraction intensity.**

5 Required torque path for the ramp-shaped contractions with 10% (red), 20% (blue) and

6 30% (green) of the participant's maximal voluntary torque. A torque rise rate of 2%/s was

7 adopted for all contractions. For the 10% and 20% contractions, 20-s and 10-s sustained

8 torque contractions phases were included, respectively, to ensure that all contractions

9 lasted 30 s.

10

## 11 Surface electromyography (sEMG)

12 sEMG was recorded during submaximal ramped contractions using two semi-

13 disposable 32-channel electrode grids with a 10-mm inter-electrode distance

14 (ELSCH032NM6, OTBIOelettronica, Torino, Italy). After skin shaving, abrasion, and

15 cleansing with 70% isopropyl alcohol, electrodes were placed over the muscle belly of

16 *soleus* and *gastrocnemius medialis*, on the medial portion of each muscle angled slightly

towards the calcaneus tendon, using a bi-adhesive foam layer and conductive paste (SpesMedica, Battipaglia, Italy). A strap electrode (WS2, OTBIOelettronica, Torino, Italy) was dampened and positioned around the ankle joint as a ground electrode. The sEMG signals were recorded in monopolar mode and converted to digital signal by a 16-bit wireless amplifier (Sessantaquattro, OTBIOelettronica, Torino, Italy) using OTBioLab+ software (version 1.3.0., OTBIOelettronica, Torino, Italy). sEMG signals were amplified (256×), sampled at 2000 Hz and band pass filtered (10-500 Hz) before being stored for offline analysis.

## **Data analysis**

### *Motor unit identification and tracking*

The recorded data were processed offline using the DEMUSE software<sup>29</sup>. For each contraction intensity, only the ramp-shaped contraction yielding the lowest deviation from the torque trajectory was analysed. High-density sEMG signal were band-pass filtered (20-500 Hz) with a second-order, zero-lag Butterworth filter. Thereafter, the blind-source, convolutive kernel compensation method of separation was used for signal decomposition<sup>29,30</sup>. To identify the same motor unit at each contraction intensity (i.e., 10, 20 and 30% of MVC), motor units were tracked using the motor unit filters methodology described in<sup>31</sup>. For this purpose, the recordings of different contraction levels were concatenated, and motor unit filters identified from individual contraction level applied to recordings of other two contraction levels, identifying the motor unit firing patterns across all the contraction levels. After removing the duplicates of motor units identified from two or more contraction levels, a trained investigator manually inspected and edited the discharge patterns of the motor units. Only motor units with a local pulse-to-noise ratio equal to or greater than 30 dB and presenting a physiological discharge pattern (visually inspected by an experienced researcher) were kept for further analysis<sup>30</sup>.

### *Estimation of PIC amplitude ( $\Delta F$ ) and maximal discharge rate*

The observed discharge events for each motor unit were converted into instantaneous discharge frequencies and fitted into a 5<sup>th</sup> order polynomial function. The

maximum value obtained from the polynomial curve was considered the maximal discharge rate. Thereafter, PIC amplitude was estimated using the paired motor unit analysis. Motor units with a low recruitment threshold (i.e., control units) were paired with higher recruitment threshold motor units (i.e., test units).  $\Delta F$  was calculated as the change in discharge frequencies of the control motor unit from the moment of recruitment to the moment of de-recruitment of the test unit<sup>16,20</sup>. In order to pair motor units, the following criteria were adopted: 1) rate-to-rate correlations between the smoothed discharge rate polynomials of the test and control units was  $r \geq 0.7$ ; 2) test units were recruited at least 1.0 s after the control units; and 3) the control unit did not show discharge rate saturation after the moment of test unit recruitment ( $> 0.5$  pps)<sup>15,16,27,28,32</sup>. Furthermore,  $\Delta F$ s were calculated only for pairs identified at all three contraction intensities, therefore including only motor units recruited from 0 to 10% of MVC, which were averaged to obtain a single  $\Delta F$  for each motor unit. Subsequently,  $\Delta F$ s and maximal discharge rates from all motor units were averaged to provide a single  $\Delta F$  per participant per intensity. Figure 2 shows one example of the paired motor unit analysis for the same pairs of motor units identified at different contraction intensities.

## Statistical analysis

A one-way repeated measure analysis of variance (ANOVA) was used to compare  $\Delta F$ s and maximal discharge rates among different contraction intensities (10, 20 and 30%). If a significant effect was found, pairwise comparisons were performed using the Holm-Bonferroni post-hoc test. Equality of variance and sphericity assumptions were met for all tested variables. Therefore, it was not necessary to apply further corrections. The effect sizes derived from the ANOVA F ratios were calculated using the omega squared ( $\omega^2$ ) method (0 - 0.01, very small; 0.01 – 0.06, small; 0.06 – 0.14, moderate; and  $> 0.14$ , large)<sup>33</sup>. In addition, the Cohen's  $d$  effect size (presented as  $d$ ) was calculated for pairwise comparisons<sup>33</sup>. All statistical tests were conducted using JASP software (version 0.11.1, University of Amsterdam, Netherlands)<sup>34</sup>. Repeated-measures Bland–Altman within-subject correlation coefficients were subsequently computed using RStudio (Version 1.3.1056) and package “rmcorr”<sup>35</sup>. This method was used to determine the association between  $\Delta F$ s and maximal discharge rates across the three contraction intensities<sup>35</sup>.



Correlation magnitude was interpreted based on Cohen's<sup>36</sup> criteria: trivial,  $r < 0.1$ ; small,  $r = 0.1-0.3$ ; moderate,  $r = 0.3-0.5$ ; large,  $r = 0.5-0.7$ ; very large,  $r = 0.7-0.9$ ; and nearly perfect,  $r > 0.9$ . Alpha level was set at 0.05 for all tests. Data are presented as mean  $\pm$  95% confidence interval (t-distribution) upper and lower limits.

## RESULTS

### Participants and motor unit identification and analysis

Twenty-one participants (8 females and 13 males) volunteered for this study ( $29.2 \pm 2.6$  years,  $72.1 \pm 8.8$  kg,  $174.9 \pm 4.9$  cm). However, two females and one male did not present motor units with a pulse-to-noise ratio  $\geq 30$  dB and were excluded from analysis. Additionally, we were unable to pair the same motor units throughout the different intensities in three participants for *soleus* and four participants for *gastrocnemius medialis*. Thus, their data were excluded from the respective muscle analysis. Therefore, our final sample consisted of 15 participants for *soleus* and 14 participants for *gastrocnemius medialis*.

For the included participants, a mean of  $7.5 \pm 2.0$  motor units were identified for the *soleus* ( $5.4 \pm 1.3$  at 10%;  $6.9 \pm 1.8$  at 20%; and  $6.6 \pm 2.1$  at 30% of MVC) while  $10.9 \pm 2.6$  motor units were identified in *gastrocnemius medialis* ( $6.8 \pm 1.8$  at 10%;  $9.7 \pm 2.5$  at 20%; and  $8.7 \pm 2.3$  at 30% of MVC). After tracking the same motor units throughout all contraction intensities, it was possible to identify on average  $4.7 \pm 1.2$  motor units for *soleus* ( $3.5 \pm 2.3$  pairs) and  $5.4 \pm 1.4$  for *gastrocnemius medialis* ( $3.5 \pm 2.15$  pairs).

The rate-rate correlations between motor unit pairs (first inclusion criteria for paired motor unit analysis) at 10%, 20%, and 30% were  $0.85 \pm 0.04$ ,  $0.93 \pm 0.12$ , and  $0.86 \pm 0.04$  for *soleus* and  $0.84 \pm 0.04$ ,  $0.84 \pm 0.03$ , and  $0.84 \pm 0.04$  for *gastrocnemius medialis*, respectively. The recruitment time differences between test and control units (second inclusion criteria) at 10%, 20%, and 30% were  $2.24 \pm 0.51$ ,  $2.54 \pm 0.99$ , and  $2.93 \pm 0.80$  s for *soleus* and  $2.43 \pm 0.58$ ,  $3.05 \pm 0.68$ , and  $2.96 \pm 0.51$  s for *gastrocnemius medialis*, respectively. There was no statistical difference between 10%, 20%, and 30% conditions for the recruitment time difference between test and control units for *soleus* ( $F_{(2-28)} = 1.712$ ;  $p = 0.199$ ;  $\omega^2 = 0.016$ ) or *gastrocnemius medialis* ( $F_{(2-26)} = 2.275$ ;  $p =$

0.123;  $\omega^2 = 0.039$ ). After test unit recruitment, increases in control unit discharge rates (third inclusion criteria) during 10%, 20%, and 30% conditions were  $2.73 \pm 0.49$ ,  $4.24 \pm 0.64$ , and  $4.84 \pm 0.57$  pps for *soleus*, and  $2.10 \pm 0.48$ ,  $3.97 \pm 0.70$ , and  $4.60 \pm 0.89$  for *gastrocnemius medialis*, respectively.

## Delta frequency ( $\Delta F$ )

The one-way repeated measures ANOVA revealed a large effect for both *soleus* ( $F_{(2-28)} = 23.696$ ;  $p < 0.001$ ;  $\omega^2 = 0.240$ ) and *gastrocnemius medialis* ( $F_{(2-26)} = 19.780$ ;  $p < 0.001$ ;  $\omega^2 = 0.268$ ). In *soleus* (Figure 2A), the post-hoc test identified differences between 10% and 20% ( $p = 0.001$ ;  $d = 0.991$ ), 10% and 30% ( $p < 0.001$ ;  $d = 1.773$ ), and between 20% and 30% ( $p = 0.005$ ;  $d = 0.782$ ). In *gastrocnemius medialis* (Figure 2B), differences between 10% and 20% ( $p < 0.001$ ;  $d = 1.442$ ) and 10 and 30% ( $p < 0.001$ ;  $d = 1.470$ ) were identified, however no differences were detected between 20% and 30% ( $p = 0.917$ ;  $d = 0.030$ ).

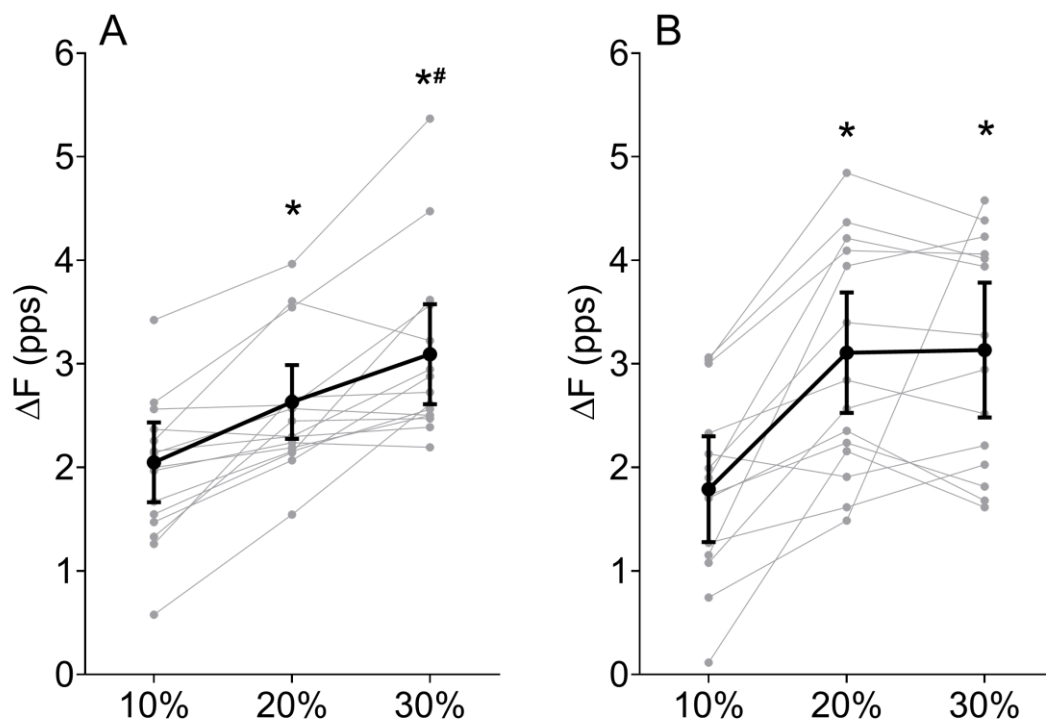

**Figure 2. Delta frequency ( $\Delta F$ ) changes across different contraction intensities.**  $\Delta F$ s obtained in *soleus* (A) and *gastrocnemius medialis* (B) at 10%, 20% and 30% of maximal

voluntary contraction. Grey dots and lines depict individual results (*soleus*,  $n = 15$ ; *gastrocnemius medialis*,  $n = 14$ ) and black dots and lines represent data mean  $\pm$  95% confidence interval lower and upper limits. \* Different to 10% and # different to 20% conditions.

## Maximal discharge rate

Maximal *soleus* and *gastrocnemius medialis* motor unit discharge rates increased with contraction intensity. ANOVA revealed a large effect for both *soleus* ( $F_{(2-28)} = 34.379$ ;  $p < 0.001$ ;  $\omega^2 = 0.363$ ) and *gastrocnemius medialis* ( $F_{(2-26)} = 89.058$ ;  $p < 0.001$ ;  $\omega^2 = 0.453$ ). For *soleus*, differences between 10% and 20% ( $p < 0.001$ ;  $d = 1.439$ ), 10% and 30% ( $p < 0.001$ ;  $d = 2.092$ ), and between 20% and 30% ( $p = 0.017$ ;  $d = 0.653$ ) were identified (Figure 3C), whilst for *gastrocnemius medialis* differences were also identified between 10% and 20% ( $p < 0.001$ ;  $d = 2.505$ ), 10% and 30% ( $p < 0.001$ ;  $d = 3.451$ ), and between 20% and 30% ( $p = 0.002$ ;  $d = 0.946$ ) (Figure 3D).

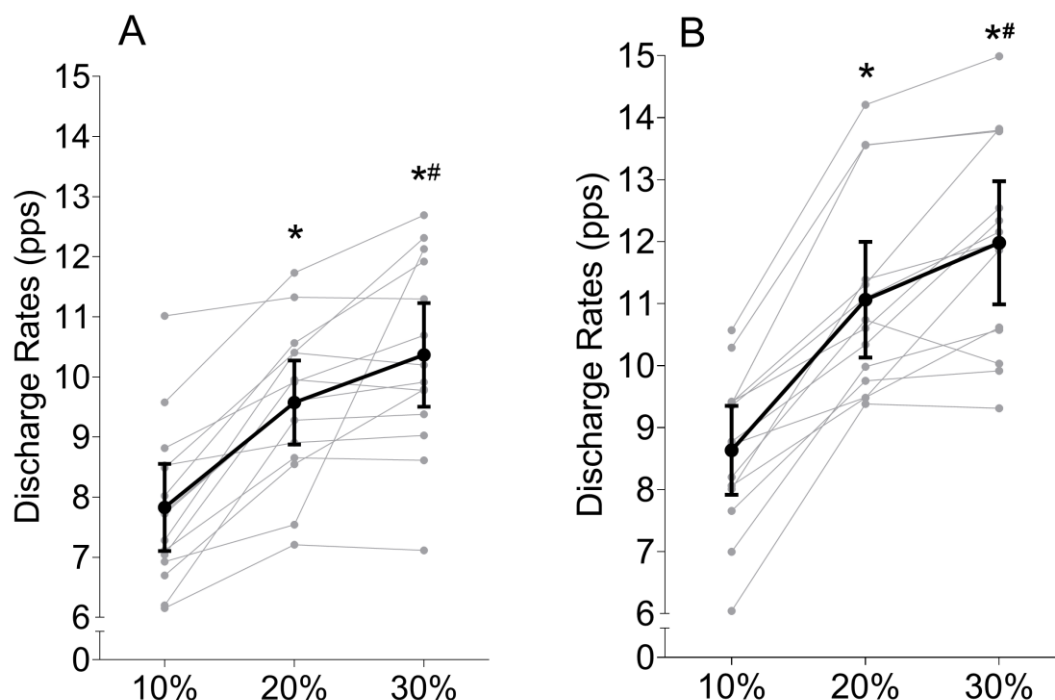

**Figure 3. Maximal discharge rate changes across different contraction intensities.**

Maximal discharge rate of *soleus* (A) and *gastrocnemius medialis* (B) motor units during

muscle contractions at 10%, 20% and 30% of maximal voluntary torque. Grey dots and lines show individual results (*soleus*, n = 15; *gastrocnemius medialis*, n = 14) and black dots and lines represent data mean  $\pm$  95% confidence interval lower and upper limits. \* Different to 10% and # different to 20% conditions.

**Table 1.** Descriptive statistics (mean and mean difference with 95% confidence interval lower and upper limits) for delta frequency ( $\Delta F$ ) and maximal discharge rates for *soleus* and *gastrocnemius medialis* at 10, 20, and 30% of maximal voluntary torque.

| Muscle contraction intensity | <i>Soleus</i>           |                              | <i>Gastrocnemius medialis</i> |                              |
|------------------------------|-------------------------|------------------------------|-------------------------------|------------------------------|
|                              | $\Delta F$ (pps)        | Maximal discharge rate (pps) | $\Delta F$ (pps)              | Maximal discharge rate (pps) |
| Mean                         |                         |                              |                               |                              |
| 10 %                         | 2.05<br>(1.66 – 2.43)   | 7.83<br>(7.10 – 8.55)        | 1.79<br>(1.28 – 2.30)         | 8.63<br>(7.92 – 9.35)        |
| 20 %                         | 2.63*<br>(2.28 – 2.99)  | 9.58*<br>(8.88 – 10.28)      | 3.10*<br>(2.52 – 3.69)        | 11.06*<br>(10.13 – 12.00)    |
| 30 %                         | 3.09*#<br>(2.61 – 3.58) | 10.37*#<br>(9.50 – 11.23)    | 3.13*<br>(2.48 – 3.78)        | 11.98*#<br>(10.99 – 12.97)   |
| Mean difference              |                         |                              |                               |                              |
| 20 – 10 %                    | 0.58<br>(0.33 – 0.84)   | 1.75<br>(1.23 – 2.26)        | 1.32<br>(0.83 – 1.81)         | 2.43<br>(1.82 – 3.03)        |
| 30 – 20 %                    | 0.46<br>(0.14 – 0.78)   | 0.80<br>(0.08 – 1.51)        | 0.03<br>(-0.34 – 0.39)        | 0.92<br>(0.36 – 1.48)        |

\* Different to 10% and # different to 20% conditions.

### Delta frequency ( $\Delta F$ ) vs Maximal discharge rate

The repeated-measures correlation between maximal discharge rates and  $\Delta F$ s across the contractions intensities was *large* for *soleus* ( $r = 0.640$ ; 95% confidence interval = 0.358 - 0.815;  $p < 0.001$ ; Figure 4A) and *very large* for *gastrocnemius medialis* ( $r = 0.773$ ; 95% confidence interval = 0.557 – 0.819;  $p < 0.001$ ; Figure 4B).

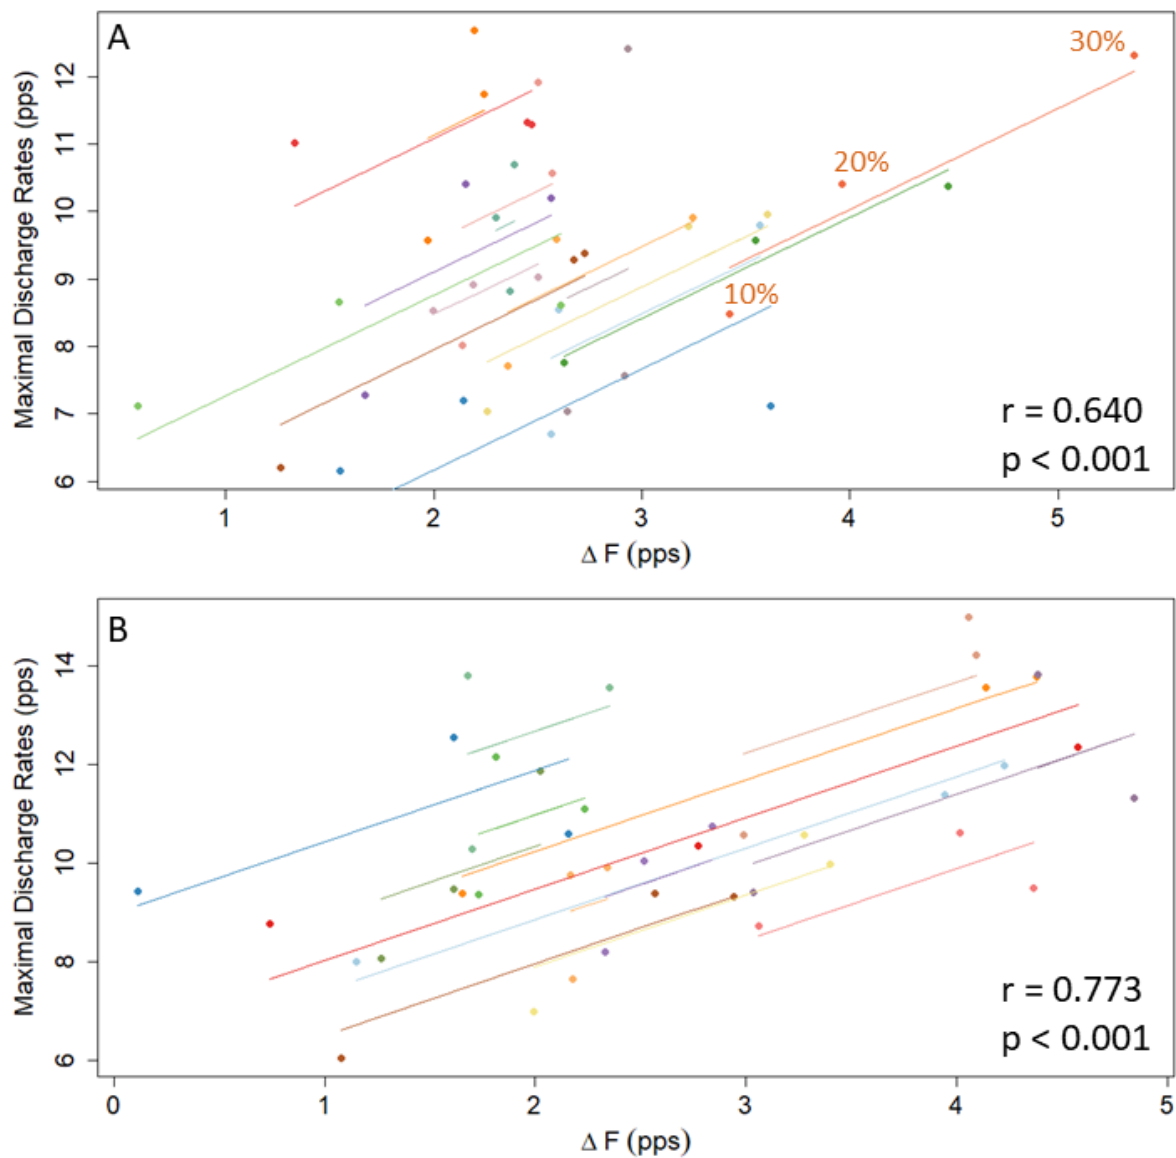

**Figure 4. Repeated-measures correlations plot illustrating the association between the maximal discharge rates and  $\Delta F$  across different contractions intensities. Panel A depicts results for *soleus* and panel B the results for *gastrocnemius medialis*. Separate parallel lines are fitted to the data from each participant across contractions intensities (10%, 20%, and 30% of MVC) and are represented by different colours.**

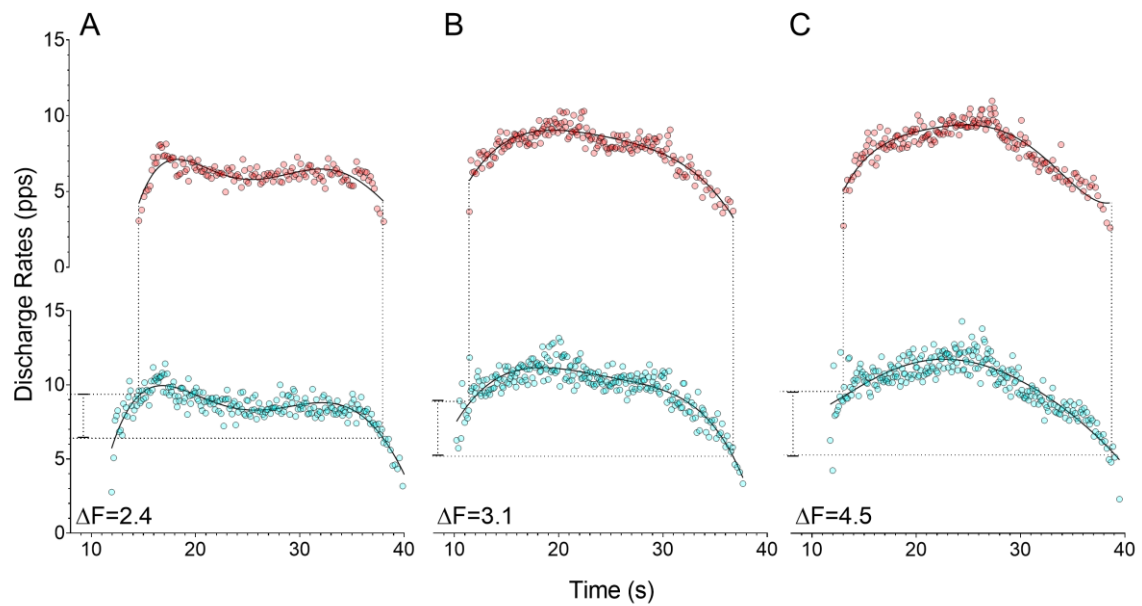

**Figure 5. Delta frequency ( $\Delta F$ ) calculation.** Paired-motor unit analysis for the  $\Delta F$  calculation from the same *soleus* motor units from one participant. Test units (top graphs - red motor units) and control units (bottom graphs - blue motor units) during the ramped isometric contractions at 10% (A), 20% (B) and 30% (C) of maximal voluntary torque. The black lines represent the fifth order polynomial fit used for the  $\Delta F$  calculation.

## DISCUSSION

The present study was designed to determine whether PIC amplitudes, estimated using paired-motor unit  $\Delta F$ s analysis, increase according to the level of voluntary motor drive in human *soleus* and *gastrocnemius medialis* motor neurones. As the motor units obtained at the lowest contraction intensity (10% MVC) were then tracked across conditions, the study focussed only on low-recruitment threshold motor units. Our results showed a significant increase in  $\Delta F$ s motor units from 10% to 20% ( $\Delta = 0.6$  pps) and 20% to 30% ( $\Delta = 0.5$  pps) of maximal voluntary contraction (MVC) in *soleus* and from 10% to 20% ( $\Delta = 1.3$  pps) of MVC in *gastrocnemius medialis*. Increases in  $\Delta F$  were also positively correlated with maximal discharge rates (output) for both *soleus* ( $r = 0.640$ ) and *gastrocnemius medialis* ( $r = 0.773$ ). These findings support the hypothesis that increases in lower-threshold motor units' PIC amplitude might act as a variable gain control in humans, increasing the gain as force production increases from 10% to 30% of

MVC. However, they are also suggestive of gain adjustments differing between synergistic muscles, as both muscles showed different  $\Delta F$  increases despite similar firing rate increases. These results not only indicate that PICs may play an important role in varying input-output gain to control muscle force production, but that between-muscle or -person  $\Delta F$  comparisons using the paired motor unit technique would need to be done with the muscles achieving the same relative level of force output (or activation).

As evidenced by our results,  $\Delta F$  appears to increase in proportion to motor output, and presumably the level of descending drive, in human *soleus* and *gastrocnemius medialis* muscles, as the increases in  $\Delta F$  and maximal discharge rate (i.e., indirect measure of muscle activation) across contraction intensities were correlated. These results are consistent with previous research in animal models<sup>9,10</sup> as well as computational modelling studies<sup>11–13</sup>. In animals, this increase in input-output relationship has been shown to be promoted by the presence of serotonin and noradrenaline in the spinal cord. For example, exogenous application of serotonin in the spinal cord increases locomotion speed (i.e., motor output) in zebrafish larvae and in newborn rats<sup>37,38</sup>. In humans, selective pharmacological manipulation of serotonin levels directly affects motor neurone excitability<sup>39,40</sup>. Circulating serotonin and noradrenaline levels are increased during higher-intensity physical exercise (higher motor output) compared to a resting state (lower or no motor output)<sup>32,41,42</sup>. Thus, it is reasonable to speculate that the increased  $\Delta F$ s observed at higher contraction intensities in the present study could result from greater serotonergic and/or noradrenergic drive. Therefore, we suggest that the contraction intensity-dependent increase in PIC amplitudes in *soleus* and *gastrocnemius medialis*, indicated by the increases in  $\Delta F$ s, may result from a greater serotonergic and/or noradrenergic drive from brainstem nuclei as voluntary drive is increased<sup>8,15</sup>. Our results corroborate the gain control system theory developed in animal and computer modelling experiments<sup>8</sup>. Higher  $\Delta F$ s accompanying both the greater torque output and maximal discharge rates indicates that this gain control system is also observed in human motor neurones.

An interesting finding was that the  $\Delta F$  increase per increment in total muscle force differed between the muscles, despite them showing similar mean overall  $\Delta F$  increases from 10-30% of MVC (1.1 pps for *soleus* and 1.3 pps for *gastrocnemius medialis*). *Soleus*  $\Delta F$  increased from 10 to 20% of MVC (from 2.05 to 2.63 pps) and then increased further



to 30% (2.63 to 3.09 pps) whereas a greater increase was observed from 10 to 20% MVC (1.79 to 3.10 pps) in *gastrocnemius medialis* without further change from 20% to 30% MVC (3.10 to 3.13 pps). One interpretation of this result is that *soleus*  $\Delta F$  increased at a smaller but more consistent rate than in *gastrocnemius medialis*, which could indicate an early saturation of the contraction intensity-PIC amplification relationship in *gastrocnemius medialis* motor neurones. That is, the identified *gastrocnemius medialis* motor units reach their maximal amplification level at a lower level of force, and presumably lower level of voluntary drive, than *soleus*. Differences in PIC amplitudes between muscles and contraction intensities could be related to the intrinsic properties of the motor neurones themselves. For example, PICs appear to last longer in the slow-type motor units' neurones<sup>43</sup>, which are more abundant in postural muscles such as *soleus* (~80-70%) than muscle such as *gastrocnemius medialis* (~55-60%)<sup>44-46</sup>.

Interestingly, our results are contrary to two recent studies that compared  $\Delta F$ s obtained from the same three contraction intensities in humans (i.e., 10, 20, and 30% of MVC)<sup>23,24</sup>. Kim et al.,<sup>24</sup> tested *soleus* and *tibialis anterior*, while Afsharipour et al.,<sup>23</sup> tested *tibialis anterior*, and none of them reported significant differences for  $\Delta F$ s among contraction intensities. A few methodological differences between their studies and ours might explain the divergence observed in our results. First, they<sup>23,24</sup> adopted distinct torque rise among contraction intensities (i.e., 10-s ramp up and 10-s ramp down for all intensities, resulting in 1%, 2%, and 3% torque rise per sec for 10%, 20%, and 30% of MVC, respectively). Quicker rates of torque rise can reduce  $\Delta F$ s due to spike-threshold accommodation<sup>11</sup>, which may have underestimated the  $\Delta F$ s when contraction intensity was increased. Second, Kim et al.,<sup>24</sup> and Afsharipour et al.,<sup>23</sup> did not track the same motor units across contractions intensities. As previously reported<sup>27</sup>, there is a large between-motor unit variability in  $\Delta F$ s, which might have reduced the sensitivity of the variable to detect differences among contractions intensities. Third, both studies compared  $\Delta F$ s obtained from different populations of motor units. Specifically, while the lower intensity condition (10% MVC) included only motor units recruited from 0-10% of maximal torque, higher intensities (20 and 30% MVC) included motor units recruited from 0-20% and 0-30% of maximal torque, respectively. Also, the proportion of lower-threshold motor units decomposed by the algorithm seems to be reduced in higher contractions intensities<sup>25</sup>. Therefore, the authors might have compared mostly



lower- vs higher-threshold motor units for lower vs higher contraction intensities, respectively. The use of motor units of different recruitment threshold for different contraction intensities limit the interpretation of the independent effect of contraction intensity on  $\Delta F$  values in these studies.

One strength of the present study was that both the rate of torque rise and decline during ramp-shaped contractions and the contraction durations were identical between conditions. This was necessary to control for potential influences of spike frequency adaptation and spike-threshold accommodation on PIC amplitude<sup>11,28</sup>. However, torque path traces were different, and it is possible that different strategies might have been used to accomplish these tasks. Another strength of the present study was that the same motor units were tracked across different contraction intensities, which allows the comparison of motor units receiving the same synaptic input. Also, a previous work from our group presented a very good reliability for  $\Delta F$ s in a repeated-measures design when the motor units were compared across different contractions<sup>47</sup>. However, this choice also reduced the total number of motor units available for study, limiting our analysis to lower-recruitment threshold motor units which initiated firing already within the lowest-intensity contraction (i.e. 10% of MVC). Thus, it remains to be determined whether these findings are obtained when higher-threshold units are studied. Based on our findings and considering the study design limitations, caution should be observed when extrapolating our findings to higher-recruitment threshold motor units and different muscles.

In conclusion, the present data suggest that estimates of PIC amplitudes ( $\Delta F$ s) in low-threshold motor units increase with the level of voluntary descending drive in human *soleus* and *gastrocnemius medialis* muscles. *Soleus* PIC amplitude increased consistently across contractions from 10 to 30% of MVC, while for *gastrocnemius medialis* PIC amplitude increased more prominently from 10 to 20% of MVC but did not increase further during the 30% MVC contraction. These results were associated to increases in maximal motor unit discharge rate with increasing contraction intensity from 10 to 30% of MVC in both *soleus* and *gastrocnemius medialis*. It appears that increases in muscle activation with increasing force occur through both an increase in voluntary descending drive and concomitant increase in PIC amplitudes, providing both cortical- and spinal-based mechanisms of muscle recruitment. Also, the data indicate that comparisons between studies that adopt different contraction strengths may not be reasonable when

1 using the paired MU technique, and that between-muscle comparisons may only be  
2 performed if the descending drive (or muscle force) is of the same relative level between  
3 the muscles. Our findings indicate only the behaviours of low-recruitment threshold  
4 motor units in *soleus* and *gastrocnemius medialis* muscles, so future research could  
5 investigate changes PIC amplitudes at higher contraction intensities (e.g., 40 – 100%  
6 MVC), and thus in higher threshold motor units, and in different muscles.

## REFERENCES

- 1 Enoka RM, Duchateau J. Rate coding and the control of muscle force. *Cold Spring Harb Perspect Med.* 2017;7(10). doi:10.1101/cshperspect.a029702.
- 2 Lee RH, Heckman CJ. Adjustable amplification of synaptic input in the dendrites of spinal motoneurons in vivo. *J Neurosci.* 2000;20(17):6734–6740.
- 3 Lee RH, Heckman CJ. Enhancement of bistability in spinal motoneurons in vivo by the noradrenergic  $\alpha 1$  agonist methoxamine. *J Neurophysiol.* 1999;81(5):2164–2174.
- 4 Hounsgaard J, Hultborn H, Jespersen B, Kiehn O. Bistability of alpha-motoneurons in the decerebrate cat and in the acute spinal cat after intravenous 5-hydroxytryptophan. *J Physiol.* 1988;405(1):345–367.
- 5 Eckert BYR, Lux HD. A Voltage-Sensitive Persistent Calcium Conductance in Neuronal Somata of Helix. *J Physiol.* 1976;254:129–151.
- 6 Schwindt P, Crill WE. A persistent negative resistance in cat lumbar motoneurons. *Brain Res.* 1977;120(1):173–178.
- 7 Hounsgaard J, Kiehn O. Calcium spikes and calcium plateaux evoked by differential polarization in dendrites of turtle motoneurons in vitro. *J Physiol.* 1993;468(1):245–259.
- 8 Johnson MD, Heckman CJ. Gain control mechanisms in spinal motoneurons. *Front Neural Circuits.* 2014;8(JULY):1–7.
- 9 Huh S, Siripuram R, Lee RH et al. PICs in motoneurons do not scale with the size of the animal: A possible mechanism for faster speed of muscle contraction in smaller species. *J Neurophysiol.* 2017;118(1):93–102.
- 10 Powers RK, Nardelli P, Cope TC. Estimation of the contribution of intrinsic currents to motoneuron firing based on paired motoneuron discharge records in the decerebrate cat. *J Neurophysiol.* 2008;100(1):292–303.
- 11 Powers RK, Heckman CJ. Contribution of intrinsic motoneuron properties to discharge hysteresis and its estimation based on paired motor unit recordings: A

- 1 simulation study. *J Neurophysiol.* 2015;114(1):184–198.
- 2 12 Heckman CJ, Binder MD. Computer simulation of the steady-state input-output  
3 function of the cat medial gastrocnemius motoneuron pool. *J Neurophysiol.*  
4 1991;65(4):952–967.
- 5 13 Heckman CJ. Computer simulations of the effects of different synaptic input  
6 systems on the steady-state input-output structure of the motoneuron pool. *J*  
7 *Neurophysiol.* 1994;71(5):1727–1739.
- 8 14 Naufel S, Glaser JJ, Kording KP, Perreault EJ, Miller LE. A muscle-activity-  
9 dependent gain between motor cortex and emg. *J Neurophysiol.* 2019;121(1):61–  
10 73.
- 11 15 Binder MD, Powers RK, Heckman CJ. Nonlinear Input-Output Functions of  
12 Motoneurons. *Physiology (Bethesda).* 2020;35(1):31–39.
- 13 16 Gorassini M, Yang JF, Siu M, Bennett DJ. Intrinsic activation of human  
14 motoneurons: Possible contribution to motor unit excitation. *J Neurophysiol.*  
15 2002;87(4):1850–1858.
- 16 17 Stephenson JL, Maluf KS. Dependence of the paired motor unit analysis on  
17 motor unit discharge characteristics in the human tibialis anterior muscle. *J*  
18 *Neurosci Methods.* 2011;198(1):84–92.
- 19 18 Powers RK, Heckman CJ. Contribution of intrinsic motoneuron properties to  
20 discharge hysteresis and its estimation based on paired motor unit recordings: A  
21 simulation study. *J Neurophysiol.* 2015;114(1):184–198.
- 22 19 Heckman CJ, Mottram C, Quinlan K, Theiss R, Schuster J. Motoneuron  
23 excitability: The importance of neuromodulatory inputs. *Clin Neurophysiol.*  
24 2009;120(12):2040–2054.
- 25 20 Heckman CJ, Gorassini MA, Bennett DJ. Persistent inward currents in  
26 motoneuron dendrites: Implications for motor output. *Muscle and Nerve.*  
27 2005;31(2):135–156.
- 28 21 Heckman CJ, Enoka RM. Motor unit. *Compr Physiol.* 2012;2(4):2629–2682.

- 22 Manuel M, Chardon M, Tysseling V, Heckman CJ. Scaling of motor output, from  
mouse to humans. *Physiology*. 2019;34(1):5–13.
- 23 Afsharipour B, Manzur N, Duchcherer J, Fenrich KF, Christopher K. Estimation  
of self-sustained activity produced by persistent inward currents using firing rate  
profiles of multiple motor units in humans. *J Neurophysiol*. 2020.  
doi:10.1152/jn.00194.2020.
- 24 Kim EH, Wilson JM, Thompson CK, Heckman CJ. Differences in Estimated  
Persistent Inward Currents Between Ankle Flexors and 2 Extensors in Humans. *J  
Neurophysiol*. 2020;21(1):1–9.
- 25 Hassan AS, Kim EH, Khurram OU et al. Properties of Motor Units of Elbow and  
Ankle Muscles Decomposed Using High-Density Surface EMG. *Proc Annu Int  
Conf IEEE Eng Med Biol Soc EMBS*. 2019;:3874–3878.
- 26 Wilson JM, Thompson CK, Miller LC, Heckman CJ. Intrinsic excitability of  
human motoneurons in biceps brachii versus triceps brachii. *J Neurophysiol*.  
2015;113(10):3692–3699.
- 27 Hassan AS, Thompson CK, Negro F et al. Impact of parameter selection on  
estimates of motoneuron excitability using paired motor unit analysis. *J Neural  
Eng*. 2020;17. doi:10.1088/1741-2552/ab5eda.
- 28 Vandenberg MS, Kalmar JM. An evaluation of paired motor unit estimates of  
persistent inward current in human motoneurons. *J Neurophysiol*.  
2014;111(9):1877–1884.
- 29 Holobar A, Zazula D. Multichannel blind source separation using convolution  
Kernel compensation. *IEEE Trans Signal Process*. 2007;55(9):4487–4496.
- 30 Holobar A, Minetto MA, Farina D. Accurate identification of motor unit  
discharge patterns from high-density surface EMG and validation with a novel  
signal-based performance metric. *J Neural Eng*. 2014;11(1). doi:10.1088/1741-  
2560/11/1/016008.
- 31 Francic A, Holobar A. On the Reuse of Motor Unit Filters in High Density  
Surface Electromyograms with Different Signal-to-Noise Ratios. In: *Proc. of T.*

1        *Jarm et al. (Eds.): EMBEC 2020. IFMBE Proceedings, 2021, pp 1–9.*

2    32    Udina E, D’Amico J, Bergquist AJ, Gorassini MA. Amphetamine increases  
3        persistent inward currents in human motoneurons estimated from paired motor-  
4        unit activity. *J Neurophysiol.* 2010;103(3):1295–1303.

5    33    Lakens D. Calculating and reporting effect sizes to facilitate cumulative science:  
6        A practical primer for t-tests and ANOVAs. *Front Psychol.* 2013;4(NOV):1–12.

7    34    JASP. JASP. 2019.<https://jasp-stats.org/>.

8    35    Bakdash JZ, Marusich LR. Repeated measures correlation. *Front Psychol.*  
9        2017;8(MAR):1–13.

10   36    Cohen J. *Statistical power analysis for the behavioral sciences.* 2nd ed. 1988.

11   37    Brustein E, Chong M, Holmqvist B, Drapeau P. Serotonin Patterns Locomotor  
12        Network Activity in the Developing Zebrafish by Modulating Quiescent Periods.  
13        *J Neurobiol.* 2003;57(3):303–322.

14   38    Cazalets JR, Sqalli-Houssaini Y, Clarac F. Activation of the central pattern  
15        generators for locomotion by serotonin and excitatory amino acids in neonatal  
16        rat. *J Physiol.* 1992;455(1):187–204.

17   39    Wei K, Glaser JI, Deng L et al. Serotonin affects movement gain control in the  
18        spinal cord. *J Neurosci.* 2014;34(38):12690–12700.

19   40    Kavanagh JJ, McFarland AJ, Taylor JL. Enhanced availability of serotonin  
20        increases activation of unfatigued muscle but exacerbates central fatigue during  
21        prolonged sustained contractions. *J Physiol.* 2019;597(1):319–332.

22   41    Ramel A, Wagner KH, Elmadfa I. Correlations between plasma noradrenaline  
23        concentrations, antioxidants, and neutrophil counts after submaximal resistance  
24        exercise in men. *Br J Sports Med.* 2004;38(5):1–4.

25   42    Chaouloff F. Physical exercise and brain monoamines: A review. *Acta Physiol*  
26        *Scand.* 1989;137(1):1–13.

27   43    Heckman CJ, Johnson M, Mottram C, Schuster J. Persistent inward currents in  
28        spinal motoneurons and their influence on human motoneuron firing patterns.

- 1        *Neuroscientist*. 2008;14(3):264–275.
- 2    44    Gollnick PD, Sjödin B, Karlsson J, Jansson E, Saltin B. Human soleus muscle: A  
3        comparison of fiber composition and enzyme activities with other leg muscles.  
4        *Pflügers Arch Eur J Physiol*. 1974;348(3):247–255.
- 5    45    Harridge SDR, Bottinelli R, Capenari M et al. Whole muscle and single-fiber  
6        contractile properties and myosin heavy chain isoforms in humans. *Pflugers Arch*  
7        - *Eur J Physiol*. 1996;432:913–920.
- 8    46    Houmard JA, Weidner ML, Gavigan KE, Tyndall GL, Hickey MS, Alshami A.  
9        Fiber type and citrate synthase activity in the human gastrocnemius and vastus  
10       lateralis with aging. *J Appl Physiol*. 1998;85(4):1337–1341.
- 11   47    Trajano GS, Taylor JL, Orssatto LBR, McNulty CR, Blazeovich AJ. Passive  
12       muscle stretching reduces estimates of persistent inward current strength in  
13       soleus motor units. *J Exp Biol*. 2020;(September):jeb.229922.
